# Supplementary material for: Bipolar Membrane Electrodialysis for Direct Conversion of L-Ornithine Monohydrochloride to L-Ornithine
Source: MDPI journal article supplement (doi:10.3390/ijms241713174), 2023-08-24
Supplement: s1 [file s1]

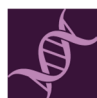

Supplementary Materials

# Bipolar Membrane Electrodialysis for Direct Conversion of L-Ornithine Monohydrochloride to L-Ornithine

Jinfeng He <sup>1,2,†</sup>, Wenlong Liu <sup>1,†</sup>, Jianrong Hao <sup>1</sup>, Xixi Ma <sup>1</sup>, Zhiyi Zheng <sup>1</sup>, Yinghan Fang <sup>1</sup>, Yuxin Liang <sup>1</sup>, Zhihao Tian <sup>1</sup>, Li Sun <sup>1,2</sup>, Chuanrun Li <sup>1,2,\*</sup> and Haiyang Yan <sup>1,2,\*</sup>

<sup>1</sup> Pharmaceutical Engineering Technology Research Center, School of Pharmacy, Anhui University of Chinese Medicine, Hefei 230012, China

<sup>2</sup> Anhui Province Key Laboratory of Pharmaceutical Preparation Technology and Application, Hefei 230012, China

\* Correspondence: crli@ahutcm.edu.cn (C.L.); oceanyan@ustc.edu.cn (H.Y.)

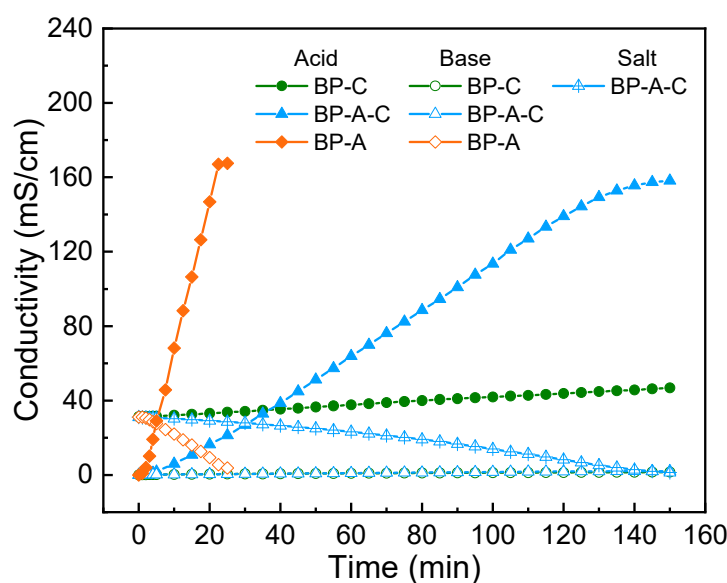

**Figure S1.** Conductivities of acid, base and salt solutions as a function of time for various stack configurations.

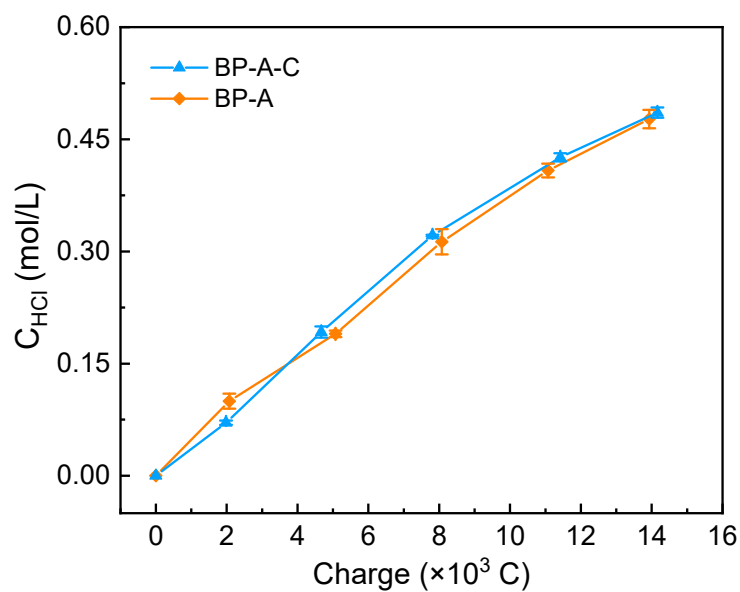

**Figure S2.** The concentration of HCl in the acid compartment ( $C_{HCl}$ ) as a function of charge for various configurations.

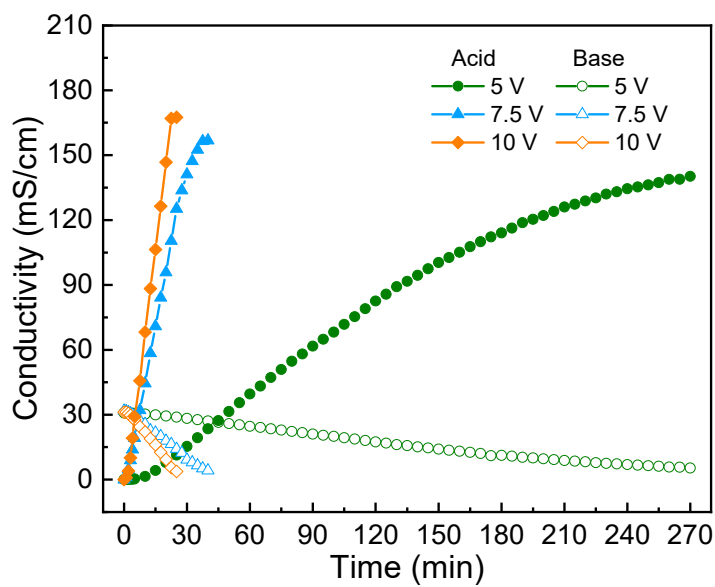

**Figure S3.** Conductivities of acid and base solutions as a function of time for various voltage drops.

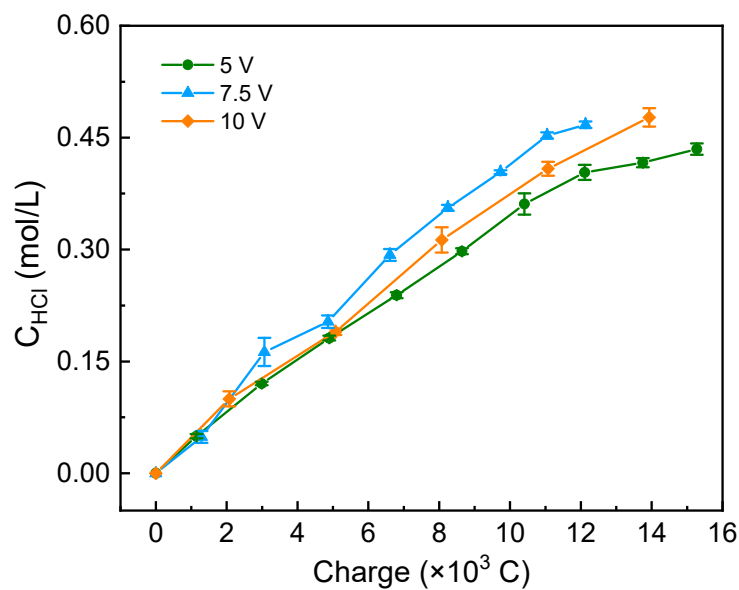

**Figure S4.** The concentration of HCl in the acid compartment ( $C_{HCl}$ ) as a function of charge for various voltage drops.

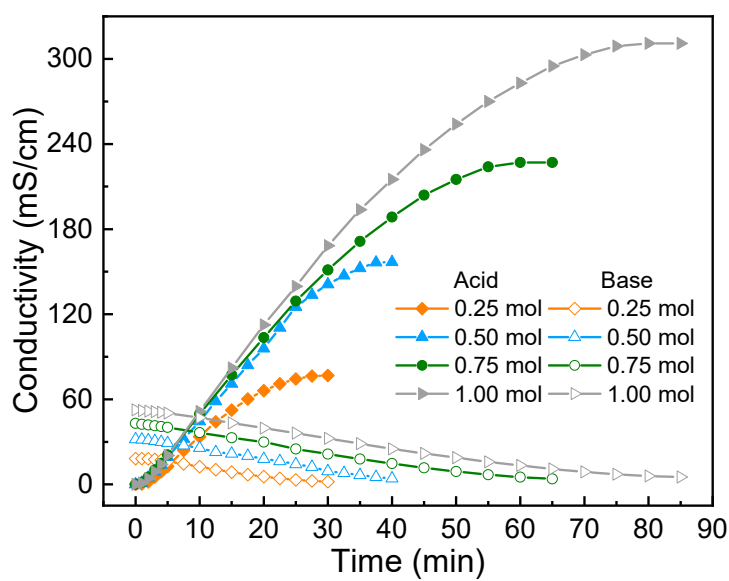

**Figure S5.** Conductivities of acid and base solutions as a function of time for various feed concentrations.

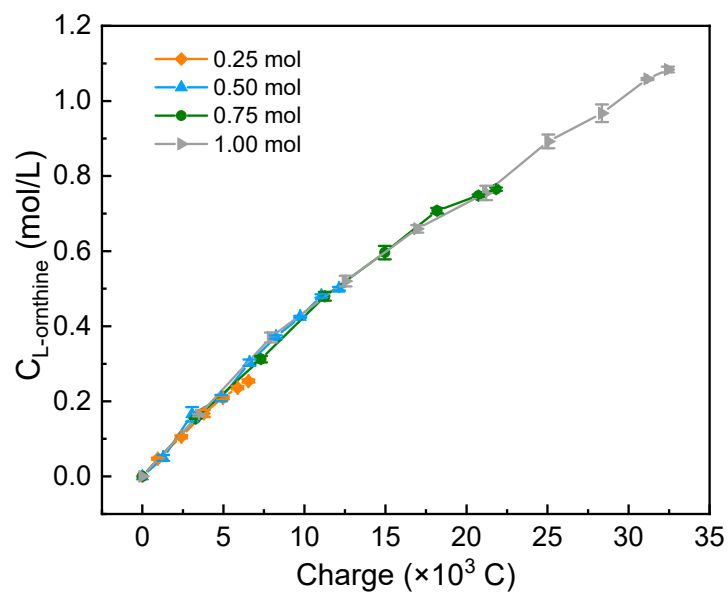

**Figure S6.** The concentration of L-ornithine in the base solution ( $C_{L-ornithine}$ ) as a function of charge for various feed concentrations.

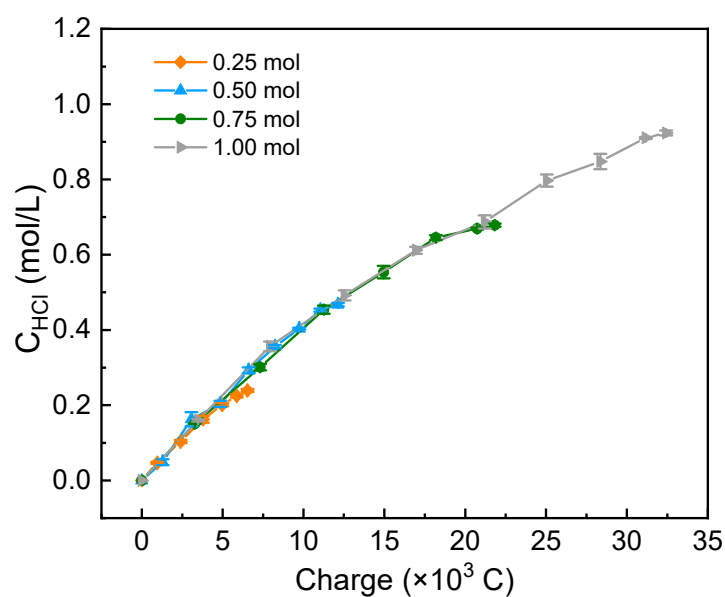

**Figure S7.** The concentration of HCl in the acid compartment ( $C_{HCl}$ ) as a function of charge for various feed concentrations.
